# Supplementary material
Source: PubMed Central journal article supplement (PMC3336812)
Supplement: supp_111.190595_JPET190595_Fig_1.pdf [file supp_111.190595_JPET190595_Fig_1.pdf]

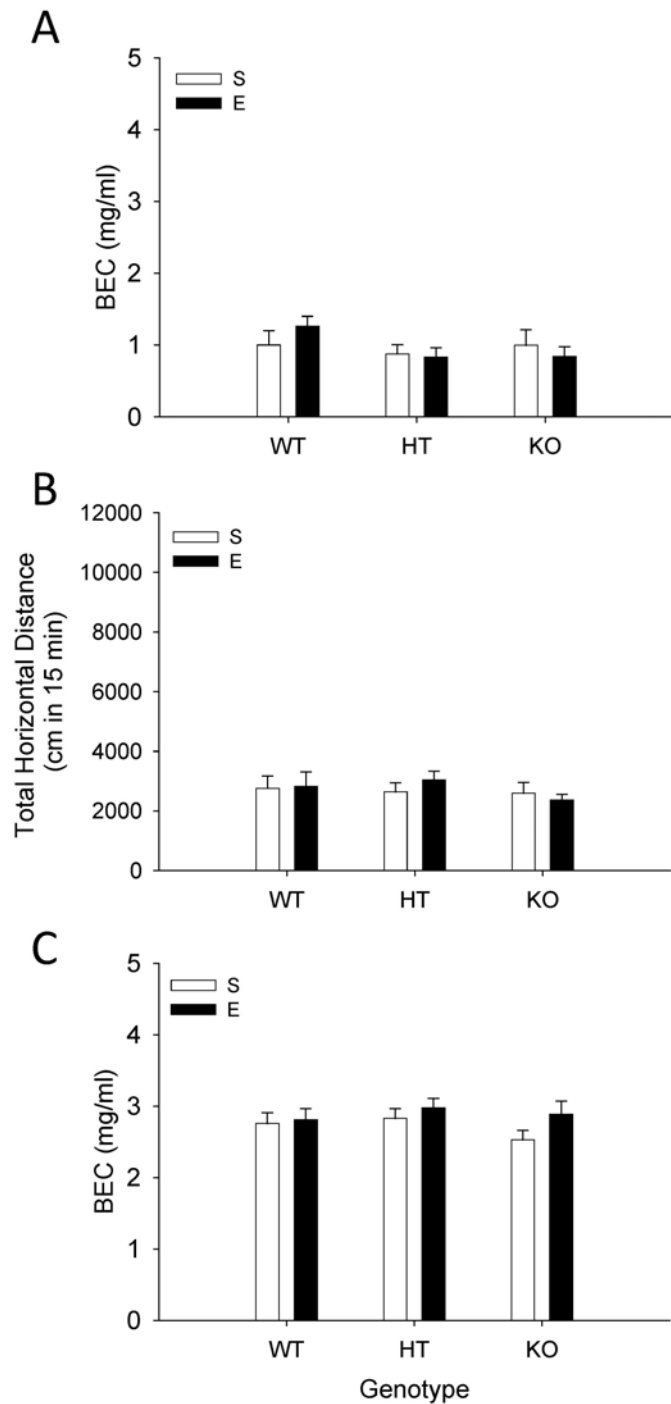

**Supplementary Fig. 1.** Corticotropin releasing factor (CRF) mutation does not affect blood ethanol concentration (BEC) or locomotion obtained after saline (S) administration. (A) BEC (mean mg/ml  $\pm$  S.E.M.) from blood obtained immediately after completion of the 15-min EtOH (E; 1.5 g/kg)-induced locomotor activity test on day 11; wild type (WT), heterozygous (HT) and CRF knockout (KO) mice ( $n = 12-16$  per group) were pretreated for 10 days with S or 2.5 g/kg E. (B) The same animals were tested on day 12 for baseline locomotion (mean cm  $\pm$  S.E.M.). (C) On day 19, upon recovery of the righting reflex, blood samples were collected for BEC determination (note that E was injected at the dose of 3.6 g/kg to induce sedation).
