# Supplementary material
Source: PubMed Central journal article supplement (PMC3336812)
Supplement: supp_111.190595_JPET190595_Figure3.pdf [file supp_111.190595_JPET190595_Figure3.pdf]

## Role of Corticotropin Releasing Factor and Corticosterone in Behavioral Sensitization to Ethanol

Raúl Pastor, Cheryl Reed, Paul J. Meyer, Carrie McKinnon, Andrey E. Ryabinin and Tamara J. Phillips

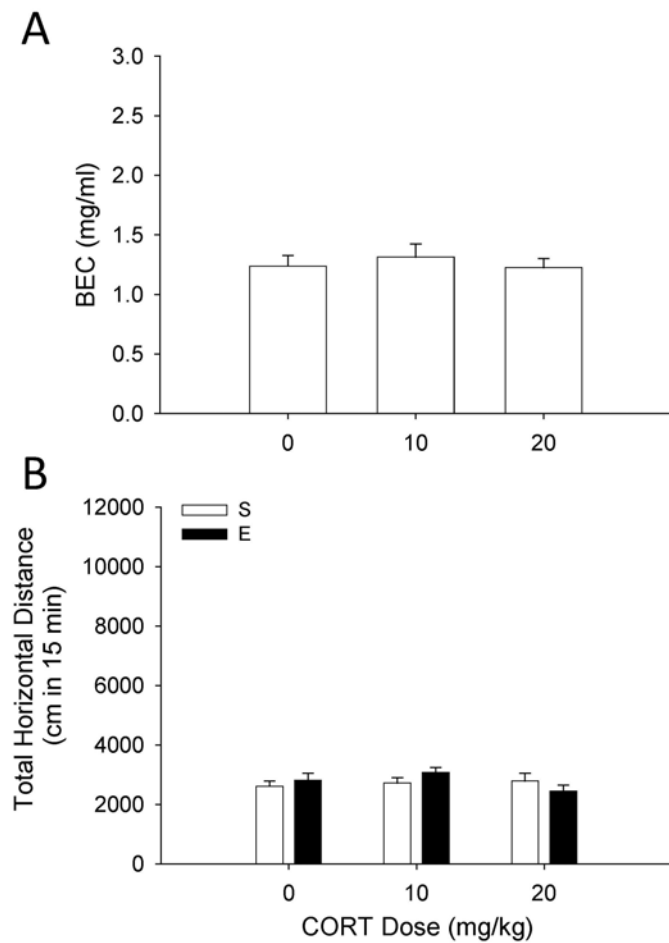

**Supplementary Fig. 3.** Repeated injections of corticosterone (CORT) do not alter (A) blood ethanol concentration (BEC; mean mg/ml  $\pm$  S.E.M.) and have no significant effect on (B) day-12 baseline locomotion (mean cm  $\pm$  S.E.M.). DBA/2J mice were treated with CORT (0, 10 or 20 mg/kg) for 10 consecutive days and injected with saline or EtOH (E; 1 g/kg on day 11). Blood samples were taken 15 min after E on day 11. Animals were injected with saline (S) and then tested for locomotor activity on day 12.
