# Supplementary material
Source: PubMed Central journal article supplement (PMC3336812)
Supplement: supp_111.190595_JPET190595_Figure4.pdf [file supp_111.190595_JPET190595_Figure4.pdf]

Raúl Pastor, Cheryl Reed, Paul J. Meyer, Carrie McKinnon, Andrey E. Ryabinin and Tamara J. Phillips

## Acquisition

## Expression

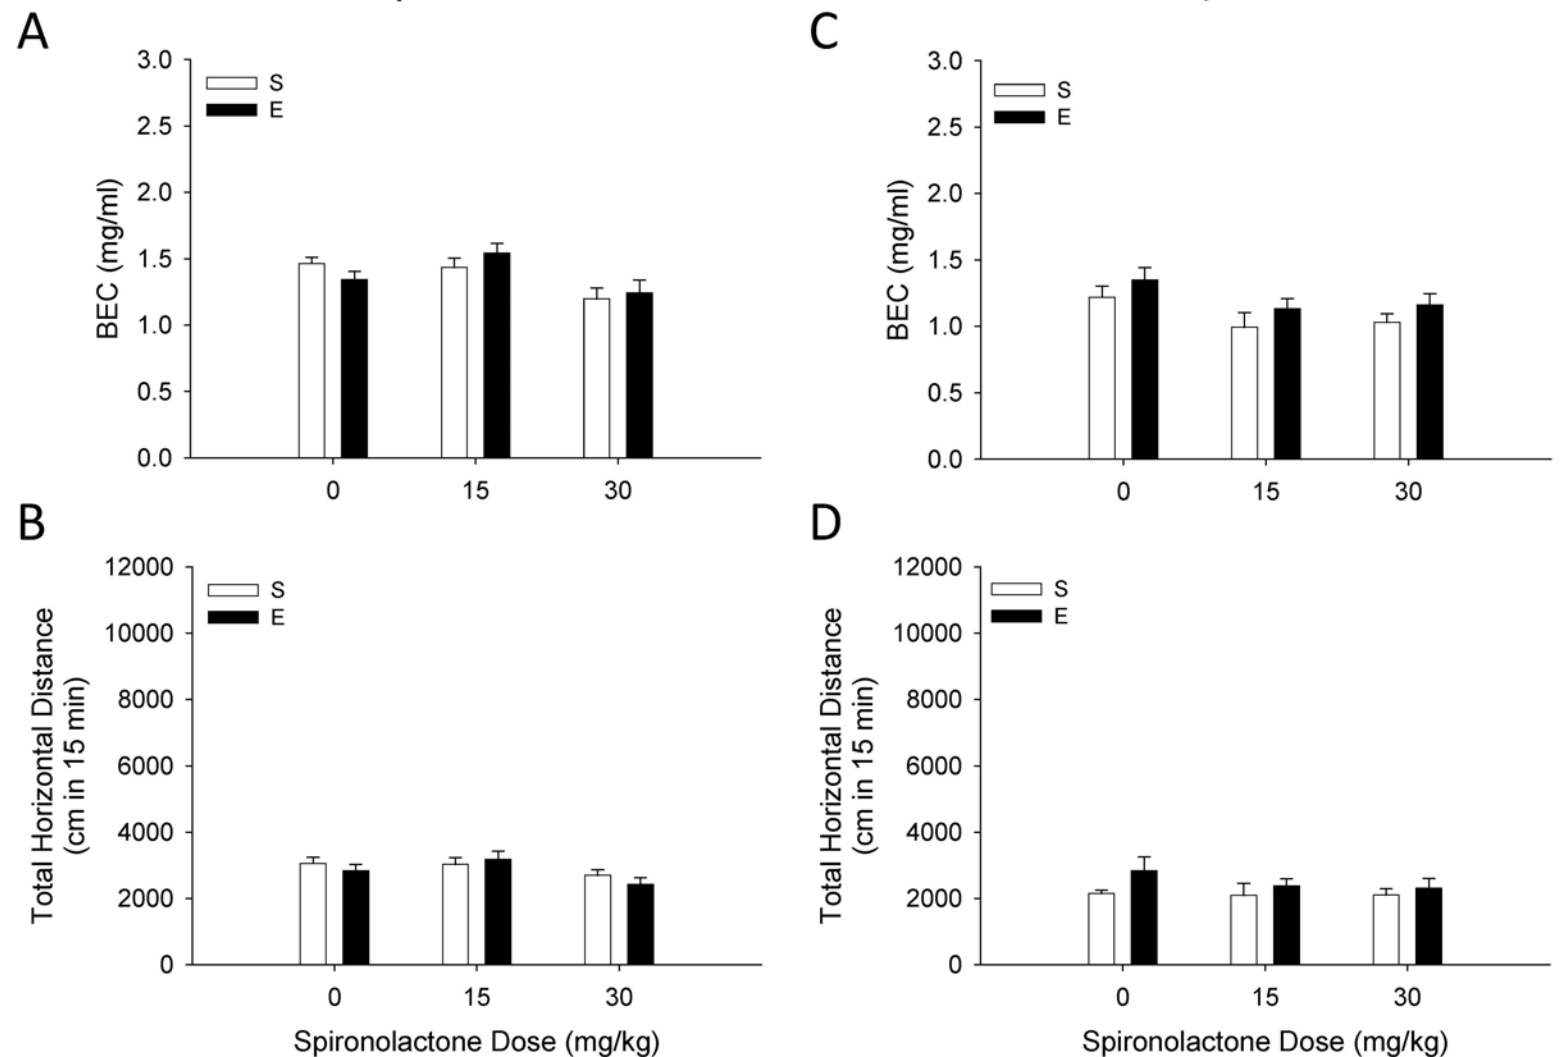

**Supplementary Fig. 4.** Spironolactone does not alter blood ethanol concentration (BEC) or locomotor activity after saline in DBA/2J mice. Analysis of BEC levels (mean mg/ml  $\pm$  S.E.M.) from samples taken on day 11, 15-min after EtOH (E; 1.5 g/kg), for both the (A) acquisition ( $n = 8-13$  per group) and (C) expression ( $n = 7-9$  per group) studies showed no effect of spironolactone. For the acquisition study, animals were pretreated for 10 days with spironolactone (0, 15 or 30 mg/kg) 30 min before receiving saline (S) or 1.5 g/kg E. For the expression study, an injection of 1.5 g/kg E was given to all animals, 30 min after spironolactone (0, 15 or 30 mg/kg) treatment of animals that had received vehicle-S or vehicle-E (1.5 g/kg) during days 1-10. Locomotor activity (mean cm  $\pm$  S.E.M.) tested after S on day 11 of both the (B) acquisition and (D) expression studies was found not to be affected by spironolactone.
